# Supplementary material for: Enhanced electrochemical performance of nanoplate nickel cobaltite (NiCo2O4) supercapacitor applications
Source: Royal Society of Chemistry journal article supplement (doi:10.1039/c8ra09081e), 2019-01-01
Supplement: c8ra09081e1.pdf [file c8ra09081e1.pdf]

## Supplementary material

### Enhanced electrochemical performance of nanoplates nickel cobaltite ( $\text{NiCo}_2\text{O}_4$ ) supercapacitor applications

Yedluri Anil Kumar\* and Hee-Je Kim

<sup>a</sup> School of Electrical Engineering, Pusan National University, Busandaehak-ro 63beon-gil,  
Geumjeong-gu, Busan, 46241, Rep. of KOREA

\*Corresponding Author. Tel: +82 10 3054 8401. Fax: +82 51 513 0212. E-mail:

[yedluri.anil@gmail.com](mailto:yedluri.anil@gmail.com) (A. K. Yedluri); [heeje@pusan.ac.kr](mailto:heeje@pusan.ac.kr) (H.-J. Kim)

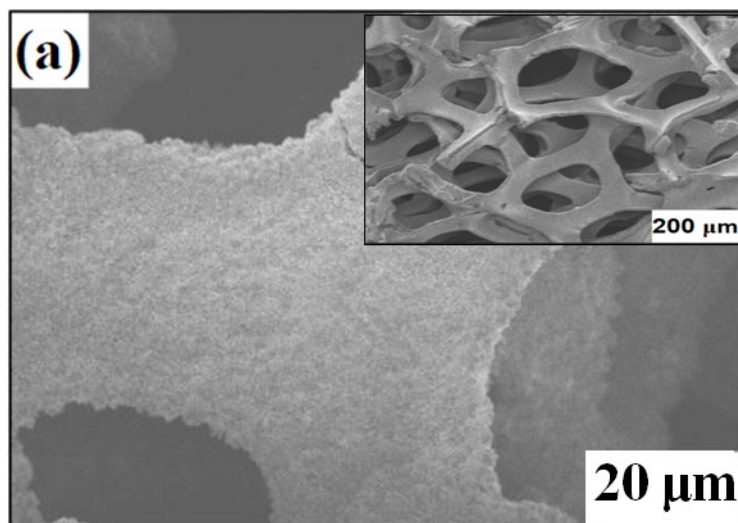

**Fig. S1** Low magnification Scanning electron microscope (SEM) images of a) a branch of visible networks of Ni foam surface coated with uniformly covered of  $\text{NiCo}_2\text{O}_4$  nanoplates. Inset: visible networks of Ni foam surface.

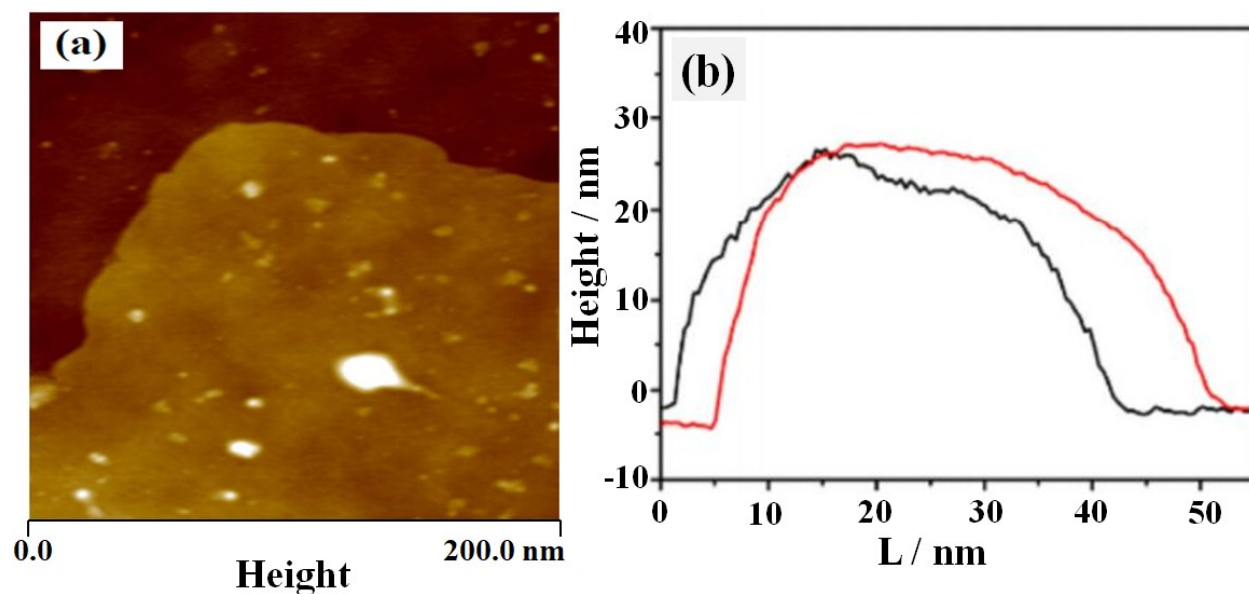

**Fig. S2** (a) Representative Atomic Force Microscopy (AFM) analysis of the  $\text{NiCo}_2\text{O}_4$  nanoplate, and (b) corresponding thickness analysis.
